# Supplementary material for: States of Aggregation and Phase Transformation Behavior of Metallosurfactant Complexes by Hexacyanoferrate(II): Thermodynamic and Kinetic Investigation of ETR in Ionic Liquids and Liposome Vesicles
Source: MDPI journal article supplement (doi:10.3390/biomimetics7040221), 2022-11-30
Supplement: s1 [file s1]

## Supplementary Information

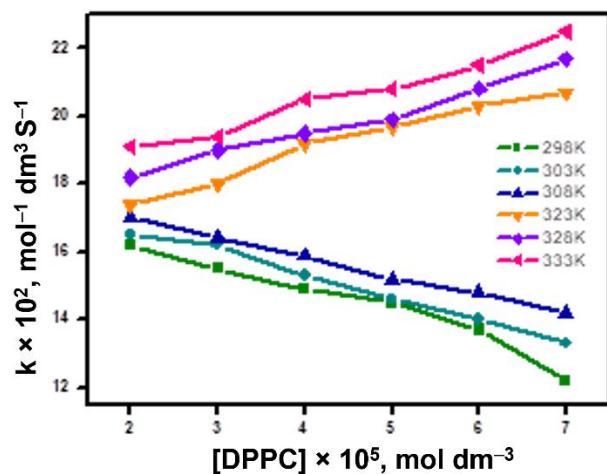

SI Figure S1 Plot of  $k$  against DPPC for  $\text{Cis-}[\text{Co}(\text{dpq})_2(\text{C}_{12}\text{H}_{25}\text{NH}_2)_2](\text{ClO}_4)_3$  under various temperatures;  $\text{cis-}[\text{Co}(\text{ip})_2(\text{C}_{12}\text{H}_{25}\text{NH}_2)_2](\text{ClO}_4)_3 = 4 \times 10^{-4} \text{ mol dm}^{-3}$ ,  $\mu = 1.0 \text{ mol dm}^{-3}$ ,  $[\text{Fe}(\text{CN})_6]^{4-} = 0.01 \text{ mol dm}^{-3}$

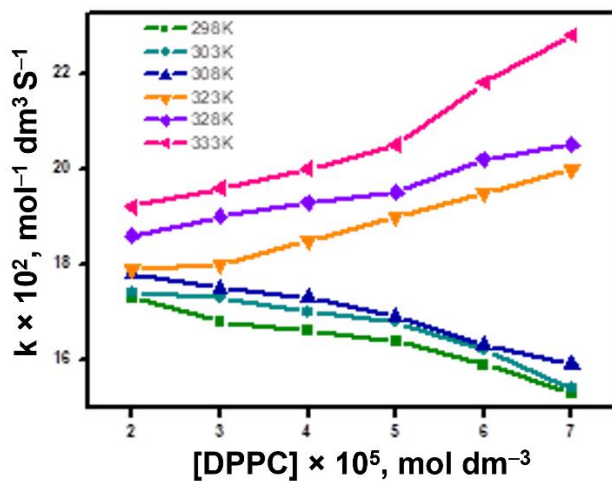

SI Figure S2 Plot of  $k$  against DPPC for  $\text{Cis-}[\text{Co}(\text{dpqc})_2(\text{C}_{12}\text{H}_{25}\text{NH}_2)_2](\text{ClO}_4)_3$  under various temperatures;  $\text{cis-}[\text{Co}(\text{ip})_2(\text{C}_{12}\text{H}_{25}\text{NH}_2)_2](\text{ClO}_4)_3 = 4 \times 10^{-4} \text{ mol dm}^{-3}$ ,  $\mu = 1.0 \text{ mol dm}^{-3}$ ,  $[\text{Fe}(\text{CN})_6]^{4-} = 0.01 \text{ mol dm}^{-3}$

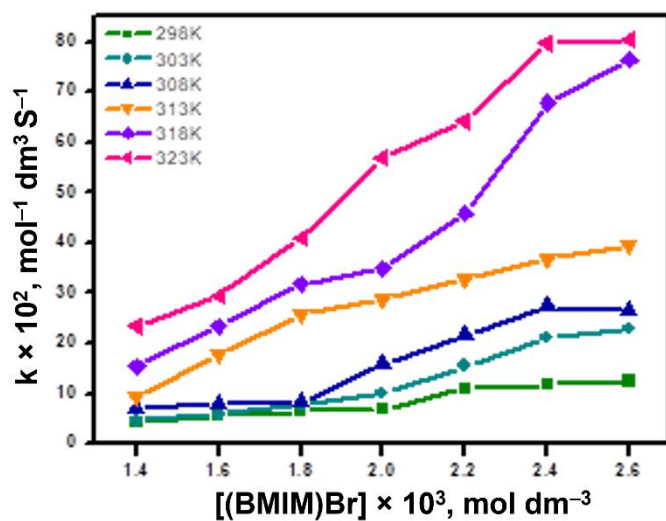

SI Figure S3 Plot of  $k$  against  $[\text{BMIM}]\text{Br}$  for  $\text{Cis-}[\text{Co}(\text{dpq})_2(\text{C}_{12}\text{H}_{25}\text{NH}_2)_2](\text{ClO}_4)_3$  at various temperatures;  $\text{Cis-}[\text{Co}(\text{ip})_2(\text{C}_{12}\text{H}_{25}\text{NH}_2)_2](\text{ClO}_4)_3 = 4 \times 10^{-4} \text{ mol dm}^{-3}$ ,  $\mu = 1.0 \text{ mol dm}^{-3}$ ,  $[\text{Fe}(\text{CN})_6]^{4-} = 0.01 \text{ mol dm}^{-3}$

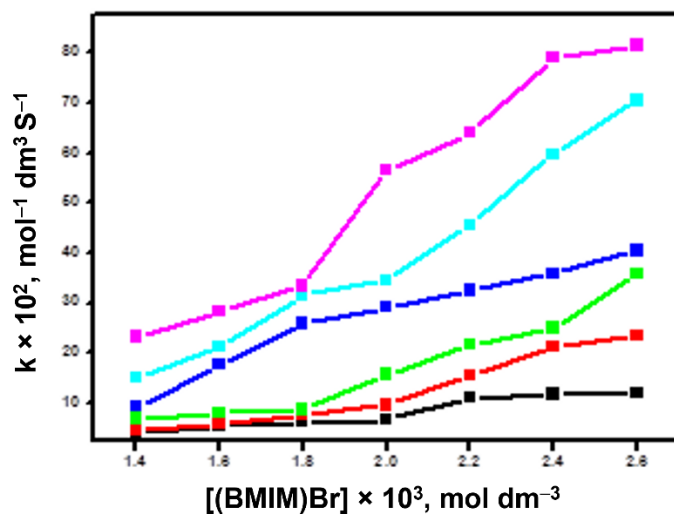

SI Figure S4 Plot of  $k$  against  $[\text{BMIM}]\text{Br}$  for  $\text{Cis-}[\text{Co}(\text{dpqc})_2(\text{C}_{12}\text{H}_{25}\text{NH}_2)_2](\text{ClO}_4)_3$  at various temperatures;  $\text{Cis-}[\text{Co}(\text{ip})_2(\text{C}_{12}\text{H}_{25}\text{NH}_2)_2](\text{ClO}_4)_3 = 4 \times 10^{-4} \text{ mol dm}^{-3}$ ,  $\mu = 1.0 \text{ mol dm}^{-3}$ ,  $[\text{Fe}(\text{CN})_6]^{4-} = 0.01 \text{ mol dm}^{-3}$

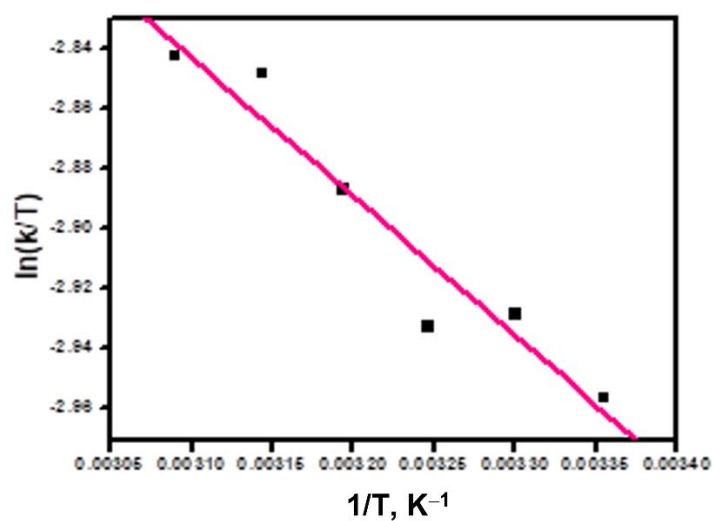

SI Figure S5 Eyring plot for Cis-[Co(dpq)<sub>2</sub>(C<sub>12</sub>H<sub>25</sub>NH<sub>2</sub>)<sub>2</sub>](ClO<sub>4</sub>)<sub>3</sub> in DPPC medium. [complex] = 4 × 10<sup>-4</sup> mol dm<sup>-3</sup>; [Fe(CN)<sub>6</sub>]<sup>4-</sup> = 0.01 mol dm<sup>-3</sup>; [μ] = 1.0 mol dm<sup>-3</sup>.

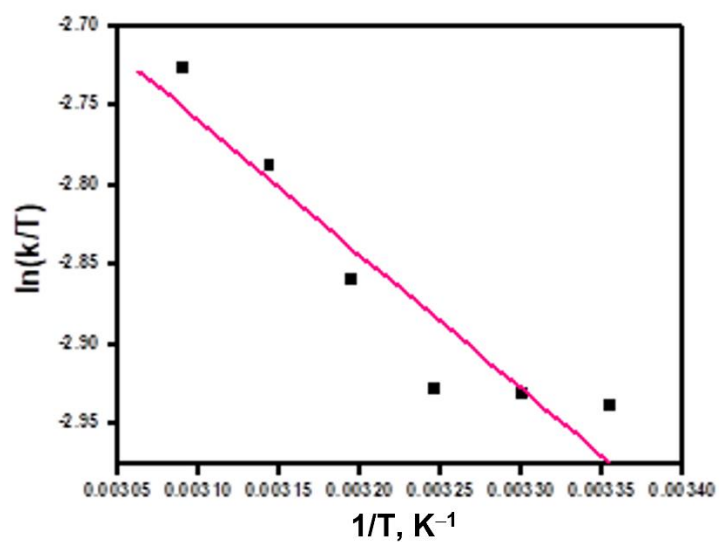

SI Figure S6 Eyring plot for Cis-[Co(dpqc)<sub>2</sub>(C<sub>12</sub>H<sub>25</sub>NH<sub>2</sub>)<sub>2</sub>](ClO<sub>4</sub>)<sub>3</sub> in DPPC medium. [complex] = 4 × 10<sup>-4</sup> mol dm<sup>-3</sup>; [Fe(CN)<sub>6</sub>]<sup>4-</sup> = 0.01 mol dm<sup>-3</sup>; [μ] = 1.0 mol dm<sup>-3</sup>.

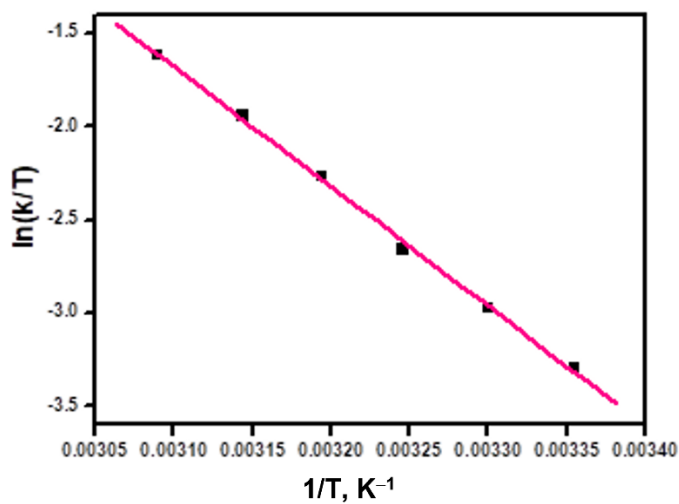

SI Figure S7 Eyring plot for Cis-[Co(dpq)<sub>2</sub>(C<sub>12</sub>H<sub>25</sub>NH<sub>2</sub>)<sub>2</sub>](ClO<sub>4</sub>)<sub>3</sub> in [BMIM]Br medium.  
[complex] =  $4 \times 10^{-4} \text{ mol dm}^{-3}$ ; [Fe(CN)<sub>6</sub>]<sup>4-</sup> =  $0.01 \text{ mol dm}^{-3}$ ; [ $\mu$ ] =  $1.0 \text{ mol dm}^{-3}$ .

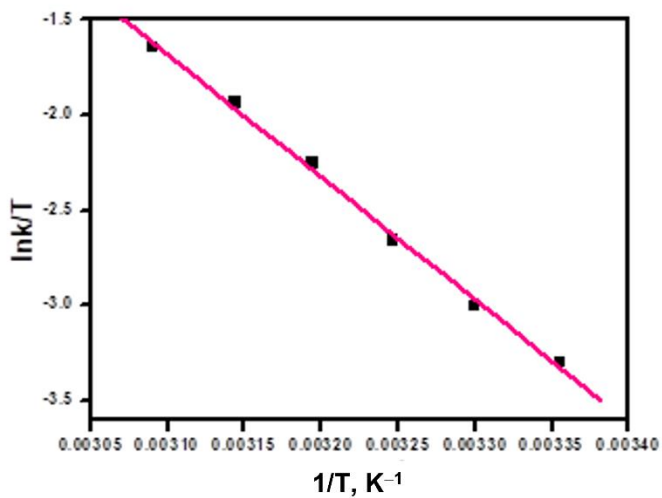

SI Figure S8 Eyring plot for Cis-[Co(dpqc)<sub>2</sub>(C<sub>12</sub>H<sub>25</sub>NH<sub>2</sub>)<sub>2</sub>](ClO<sub>4</sub>)<sub>3</sub> in [BMIM]Br medium.  
[complex] =  $4 \times 10^{-4} \text{ mol dm}^{-3}$ ; [Fe(CN)<sub>6</sub>]<sup>4-</sup> =  $0.01 \text{ mol dm}^{-3}$ ; [ $\mu$ ] =  $1.0 \text{ mol dm}^{-3}$ .

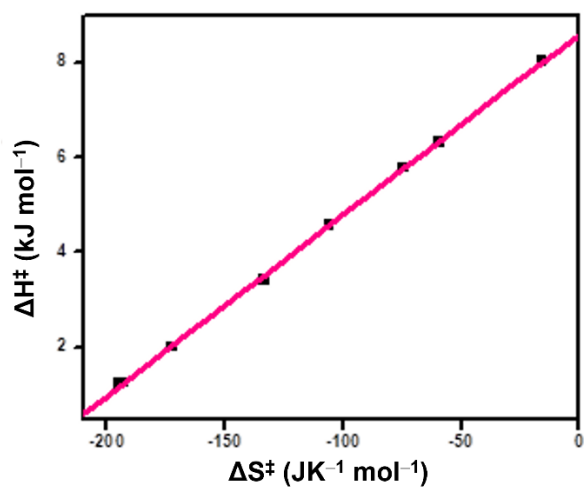

SI Figure S9 Isokinetic plot of the activation parameters for the reduction of Cis-[Co(dpq)<sub>2</sub>(C<sub>12</sub>H<sub>25</sub>NH<sub>2</sub>)<sub>2</sub>](ClO<sub>4</sub>)<sub>3</sub> by ion(II) in DPPC medium. [complex] = 4 x 10<sup>-4</sup> mol dm<sup>-3</sup>; [Fe<sup>2+</sup>] = 0.01 mol dm<sup>-3</sup>; [μ] = 1.0 mol dm<sup>-3</sup>. Note: Entropy and Enthalpy of activation is symbolized ΔS<sup>‡</sup> and ΔH<sup>‡</sup>.

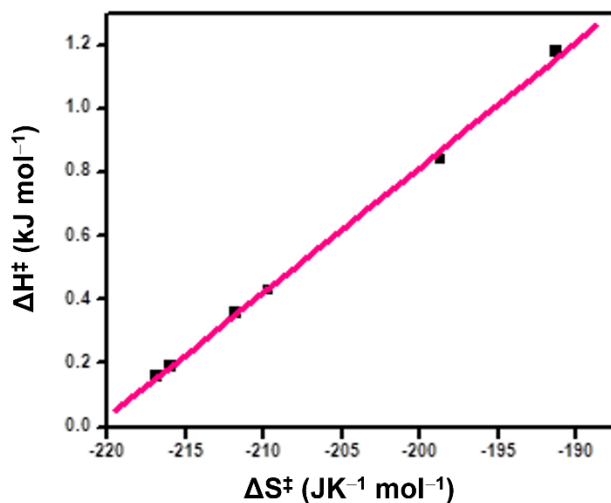

SI Figure S10 Isokinetic plot of the activation parameters for the reduction of Cis-[Co(dpqc)<sub>2</sub>(C<sub>12</sub>H<sub>25</sub>NH<sub>2</sub>)<sub>2</sub>](ClO<sub>4</sub>)<sub>3</sub> by ion(II) in aqueous solutions. [complex] = 4 x 10<sup>-4</sup> mol dm<sup>-3</sup>; [Fe(CN)<sub>6</sub>]<sup>4-</sup> = 0.01 mol dm<sup>-3</sup>; [μ] = 1.0 mol dm<sup>-3</sup>. Note: Entropy and Enthalpy of activation is symbolized ΔS<sup>‡</sup> and ΔH<sup>‡</sup>.

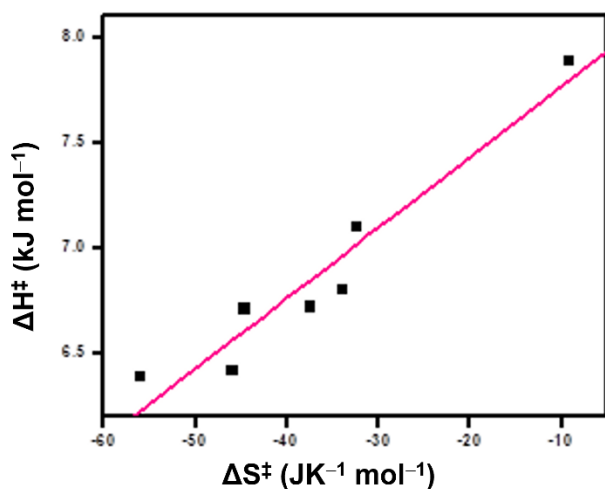

SI Figure S11 Isokinetic plot of the activation parameters for the reduction of Cis-[Co(dpq)<sub>2</sub>(C<sub>12</sub>H<sub>25</sub>NH<sub>2</sub>)<sub>2</sub>](ClO<sub>4</sub>)<sub>3</sub> by ion(II) in [BMIM]Br medium. [complex] = 4 x 10<sup>-4</sup> mol dm<sup>-3</sup>; [Fe(CN)<sub>6</sub>]<sup>4-</sup> = 0.01 mol dm<sup>-3</sup>; [μ] = 1.0 mol dm<sup>-3</sup>. Note: Entropy and Enthalpy of activation is symbolized  $\Delta S^\ddagger$  and  $\Delta H^\ddagger$ .

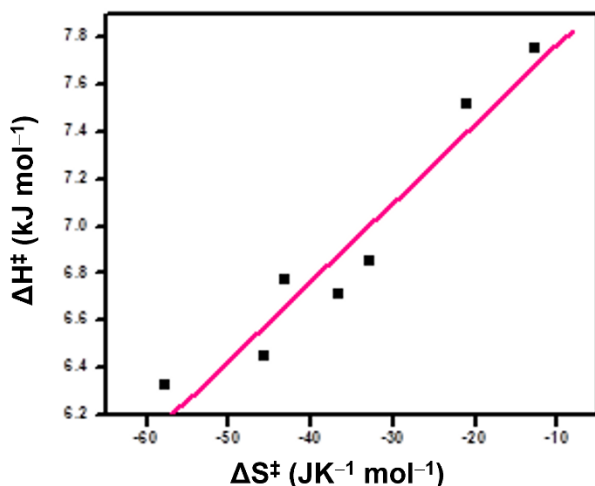

SI Figure S12 Isokinetic plot of the activation parameters for the reduction of Cis-[Co(dpqc)<sub>2</sub>(C<sub>12</sub>H<sub>25</sub>NH<sub>2</sub>)<sub>2</sub>](ClO<sub>4</sub>)<sub>3</sub> by ion(II) in [BMIM]Br medium. [complex] = 4 x 10<sup>-4</sup> mol dm<sup>-3</sup>; [Fe(CN)<sub>6</sub>]<sup>4-</sup> = 0.01 mol dm<sup>-3</sup>; [μ] = 1.0 mol dm<sup>-3</sup>. **Note:** Entropy and Enthalpy of activation is symbolized  $\Delta S^\ddagger$  and  $\Delta H^\ddagger$ .

## Tables

SI Table S1. Second-order rate constants for the reduction of cobalt(III) complex ion by  $\text{Fe}^{2+}$  in DPPC under various temperatures.  $\text{Cis-}[\text{Co}(\text{dpq})_2(\text{C}_{12}\text{H}_{25}\text{NH}_2)_2](\text{ClO}_4)_3 = 4 \times 10^{-4} \text{ mol dm}^{-3}$ ,  $\mu = 1.0 \text{ mol dm}^{-3}$ ,  $[\text{Fe}(\text{CN})_6]^{4-} = 0.01 \text{ mol dm}^{-3}$

| $[\text{DPPC}] \times 10^5$<br>( $\text{mol dm}^{-3}$ ) | $k \times 10^2, \text{ dm}^3 \text{ mol}^{-1} \text{ s}^{-1}$ |      |      |      |      |      |
|---------------------------------------------------------|---------------------------------------------------------------|------|------|------|------|------|
|                                                         | 298K                                                          | 303K | 308K | 323K | 328K | 333K |
| 2.0                                                     | 16.2                                                          | 16.5 | 17.0 | 17.4 | 18.2 | 19.1 |
| 3.0                                                     | 15.5                                                          | 16.2 | 16.4 | 18.0 | 19.0 | 19.4 |
| 4.0                                                     | 14.9                                                          | 15.3 | 15.9 | 19.2 | 19.5 | 20.5 |
| 5.0                                                     | 14.5                                                          | 14.6 | 15.2 | 19.7 | 19.9 | 20.8 |
| 6.0                                                     | 13.7                                                          | 14.0 | 14.8 | 20.3 | 20.8 | 21.5 |
| 7.0                                                     | 12.2                                                          | 13.3 | 14.2 | 20.7 | 21.7 | 22.5 |

SI Table S2. Second-order rate constants for the reduction of cobalt(III) complex ion by  $\text{Fe}^{2+}$  in DPPC under various temperatures.  $\text{Cis-}[\text{Co}(\text{dpqc})_2(\text{C}_{12}\text{H}_{25}\text{NH}_2)_2](\text{ClO}_4)_3 = 4 \times 10^{-4} \text{ mol dm}^{-3}$ ,  $\mu = 1.0 \text{ mol dm}^{-3}$ ,  $[\text{Fe}(\text{CN})_6]^{4-} = 0.01 \text{ mol dm}^{-3}$

| $[\text{DPPC}] \times 10^5$<br>( $\text{mol dm}^{-3}$ ) | $k \times 10^2, \text{ dm}^3 \text{ mol}^{-1} \text{ s}^{-1}$ |      |      |      |      |      |
|---------------------------------------------------------|---------------------------------------------------------------|------|------|------|------|------|
|                                                         | 298K                                                          | 303K | 308K | 323K | 328K | 333K |
| 2.0                                                     | 17.3                                                          | 17.4 | 17.8 | 17.9 | 18.6 | 19.2 |
| 3.0                                                     | 16.8                                                          | 17.3 | 17.5 | 18.0 | 19.0 | 19.6 |
| 4.0                                                     | 16.6                                                          | 17.0 | 17.3 | 18.5 | 19.3 | 20.0 |
| 5.0                                                     | 16.4                                                          | 16.8 | 16.9 | 19.0 | 19.5 | 20.5 |
| 6.0                                                     | 15.9                                                          | 16.2 | 16.3 | 19.5 | 20.2 | 21.8 |
| 7.0                                                     | 15.3                                                          | 15.4 | 15.9 | 20.0 | 20.5 | 22.8 |

SI Table S3. Second-order rate constants for the reduction of cobalt(III) complex ion by  $\text{Fe}^{2+}$  in the presence of [BMIM]Br medium under various temperatures. Cis- $[\text{Co}(\text{dpq})_2(\text{C}_{12}\text{H}_{25}\text{NH}_2)_2](\text{ClO}_4)_3 = 4 \times 10^{-4} \text{ mol dm}^{-3}$ ,  $\mu = 1.0 \text{ mol dm}^{-3}$ ,  $[\text{Fe}(\text{CN})_6]^{4-} = 0.01 \text{ mol dm}^{-3}$

| $[(\text{BMIM})\text{Br}] \times 10^3,$<br>$\text{mol dm}^{-3}$ | $k \times 10^2, \text{dm}^3 \text{mol}^{-1} \text{s}^{-1}$ |      |      |      |      |      |
|-----------------------------------------------------------------|------------------------------------------------------------|------|------|------|------|------|
|                                                                 | 298K                                                       | 303K | 308K | 313K | 318K | 323K |
| 1.4                                                             | 4.0                                                        | 4.2  | 6.5  | 8.9  | 14.7 | 23.0 |
| 1.6                                                             | 5.2                                                        | 5.5  | 7.7  | 12.0 | 20.6 | 27.4 |
| 1.8                                                             | 6.1                                                        | 7.4  | 8.5  | 25.5 | 31.5 | 33.7 |
| 2.0                                                             | 6.5                                                        | 9.4  | 15.5 | 28.6 | 34.8 | 55.4 |
| 2.2                                                             | 10.5                                                       | 15.2 | 21.3 | 32.1 | 45.3 | 63.7 |
| 2.4                                                             | 11.4                                                       | 20.2 | 24.2 | 35.2 | 58.2 | 77.2 |
| 2.6                                                             | 11.6                                                       | 21.2 | 25.6 | 36.2 | 59.6 | 80.4 |

SI Table S4. Second-order rate constants for the reduction of cobalt(III) complex ion by  $\text{Fe}^{2+}$  in the presence of [BMIM]Br medium under various temperatures. Cis- $[\text{Co}(\text{dpqc})_2(\text{C}_{12}\text{H}_{25}\text{NH}_2)_2](\text{ClO}_4)_3 = 4 \times 10^{-4} \text{ mol dm}^{-3}$ ,  $\mu = 1.0 \text{ mol dm}^{-3}$ ,  $[\text{Fe}(\text{CN})_6]^{4-} = 0.01 \text{ mol dm}^{-3}$

| $[(\text{BMIM})\text{Br}]$<br>$\times 10^3, \text{mol dm}^{-3}$ | $k \times 10^2, \text{dm}^3 \text{mol}^{-1} \text{s}^{-1}$ |      |      |      |      |      |
|-----------------------------------------------------------------|------------------------------------------------------------|------|------|------|------|------|
|                                                                 | 298K                                                       | 303K | 308K | 313K | 318K | 323K |
| 1.4                                                             | 4.3                                                        | 4.6  | 7.0  | 9.5  | 15.4 | 23.5 |
| 1.6                                                             | 5.6                                                        | 5.9  | 8.1  | 17.8 | 23.5 | 29.5 |
| 1.8                                                             | 6.5                                                        | 7.6  | 8.3  | 25.9 | 31.8 | 41.0 |
| 2.0                                                             | 6.8                                                        | 10.0 | 15.9 | 29   | 35.0 | 57.0 |
| 2.2                                                             | 11.0                                                       | 15.5 | 21.6 | 32.9 | 45.9 | 64.2 |
| 2.4                                                             | 11.8                                                       | 21.1 | 27.4 | 36.9 | 67.8 | 80.8 |
| 2.6                                                             | 12.5                                                       | 22.9 | 26.5 | 39.5 | 76.4 | 82.4 |



SI Table S5. Activation parameters for the reduction of Cis-[Co(dpq)<sub>2</sub>(C<sub>12</sub>H<sub>25</sub>NH<sub>2</sub>)<sub>2</sub>](ClO<sub>4</sub>)<sub>3</sub> ,  $\mu = 1.0 \text{ mol dm}^{-3}$  in DPPC medium. **Note:** Entropy and Enthalpy of activation is symbolized  $\Delta S^\ddagger$  and  $\Delta H^\ddagger$ .

| $[\text{DPPC}] \times 10^5$<br>(mol dm <sup>-3</sup> ) | $\Delta H^\ddagger$ | $-\Delta S^\ddagger$ |
|--------------------------------------------------------|---------------------|----------------------|
| 2.0                                                    | 1.26                | 193.3                |
| 3.0                                                    | 2.01                | 172.5                |
| 4.0                                                    | 3.43                | 133.4                |
| 5.0                                                    | 4.57                | 106.0                |
| 6.0                                                    | 5.79                | 74.20                |
| 7.0                                                    | 6.33                | 59.40                |
| 8.0                                                    | 8.02                | 15.80                |

SI Table S6. Activation parameters for the reduction of Cis-[Co(dpqc)<sub>2</sub>(C<sub>12</sub>H<sub>25</sub>NH<sub>2</sub>)<sub>2</sub>](ClO<sub>4</sub>)<sub>3</sub> ,  $\mu = 1.0 \text{ mol dm}^{-3}$  in DPPC medium. **Note:** Entropy and Enthalpy of activation is symbolized  $\Delta S^\ddagger$  and  $\Delta H^\ddagger$ .

| $[\text{DPPC}] \times 10^5$<br>(mol dm <sup>-3</sup> ) | $\Delta H^\ddagger$ | $-\Delta S^\ddagger$ |
|--------------------------------------------------------|---------------------|----------------------|
| 2.0                                                    | 0.16                | 216.9                |
| 3.0                                                    | 0.19                | 216.0                |
| 4.0                                                    | 0.36                | 211.8                |
| 5.0                                                    | 0.43                | 209.7                |
| 6.0                                                    | 0.84                | 198.7                |
| 7.0                                                    | 1.18                | 191.3                |

SI Table S7. Activation parameters for the reduction of Cis-[Co(dpq)<sub>2</sub>(C<sub>12</sub>H<sub>25</sub>NH<sub>2</sub>)<sub>2</sub>](ClO<sub>4</sub>)<sub>3</sub> ,  $\mu = 1.0 \text{ mol dm}^{-3}$  in [BMIM]Br medium. **Note:** Entropy and Enthalpy of activation is symbolized  $\Delta S^\ddagger$  and  $\Delta H^\ddagger$ .

| $[(\text{BMIM})\text{Br}] \times 10^3, \text{ mol dm}^{-3}$ | $\Delta H^\ddagger$ | $-\Delta S^\ddagger$ |
|-------------------------------------------------------------|---------------------|----------------------|
| 1.4                                                         | 6.39                | 55.9                 |
| 1.6                                                         | 6.42                | 45.9                 |
| 1.8                                                         | 6.71                | 44.6                 |
| 2.0                                                         | 6.72                | 37.4                 |
| 2.2                                                         | 6.80                | 33.9                 |
| 2.4                                                         | 7.10                | 32.4                 |
| 2.6                                                         | 7.89                | -9.2                 |

SI Table S8. Activation parameters for the reduction of Cis-[Co(dpqc)<sub>2</sub>(C<sub>12</sub>H<sub>25</sub>NH<sub>2</sub>)<sub>2</sub>](ClO<sub>4</sub>)<sub>3</sub> ,  $\mu = 1.0 \text{ mol dm}^{-3}$  in [BMIM]Br medium. **Note:** Entropy and Enthalpy of activation is symbolized  $\Delta S^\ddagger$  and  $\Delta H^\ddagger$ .

| $[(\text{BMIM})\text{Br}] \times 10^3, \text{ mol dm}^{-3}$ | $\Delta H^\ddagger$ | $-\Delta S^\ddagger$ |
|-------------------------------------------------------------|---------------------|----------------------|
| 1.4                                                         | 6.33                | 57.7                 |
| 1.6                                                         | 6.45                | 45.7                 |
| 1.8                                                         | 6.77                | 43.2                 |
| 2.0                                                         | 6.71                | 36.5                 |
| 2.2                                                         | 6.85                | 32.8                 |
| 2.4                                                         | 7.52                | 20.9                 |
| 2.6                                                         | 7.75                | 12.6                 |
